# Supplementary material for: Renal cell carcinoma with succinate dehydrogenase A mutation: A case report and literature review
Source: PubMed Central journal article supplement — Oncol Lett. 2024 Dec 3;29(2):84. doi: 10.3892/ol.2024.14830 (PMC11632410; doi:10.3892/ol.2024.14830), 2024-12-03

## Supplementary information

*Hematoxylin and eosin (H&E) protocol.* The samples were fixed with 4% neutral formaldehyde solution at room temperature for 12-24 h, were paraffin-embedded (FFPE) and cut into 5- $\mu$ m thick sections after deparaffinization and rehydration. The sections were stained with hematoxylin solution for 5 min at room temperature followed by 5 dips in 1% acid ethanol (1% HCl in 70% ethanol) and then rinsed in distilled water. After which, the sections were stained with eosin solution for 3 min at room temperature, followed by dehydration with graded alcohol and clearing in xylene. The mounted slides were then examined using an Olympus BX53 light microscope (Olympus Corporation).

*Immunohistochemistry (IHC) protocol.* Samples were fixed in neutral formaldehyde solution (4%) at room temperature for 12-24 h, paraffin-embedded (FFPE) and cut into 4- $\mu$ m-thick sections. The sections were dried, deparaffinized

and dehydrated in a graded ethanol series. The antigen was retrieved by a high-pressure method using alkaline pH (pH 8.0) for 1 min, and then washed by phosphate buffered saline (PBS) 3 times. After which, the tissue sections were treated with 1% hydrogen peroxide for 10 min to block endogenous tissue peroxidase activity and non-specific protein binding. The slides were incubated with primary antibodies including PAX8, SDHA, SDHB, CAIX, CK7, CD10, CD117, P504S, Vimentin, E-Cadherin, HMB45, Cathepsin K, Melan-A, S-100, TFE3, TFEB, fumarate hydratase (FH) and Ki67 (the detailed information was seen in Table SI) overnight at 4°C, followed by incubation at room temperature for 30 min with the Ultra-Sensitive S-P Kit (containing the secondary antibodies; Fuzhou Maixin Biotech Co., Ltd.; cat. no. KIT-9710). The slides were washed with PBS before color development using a 3,3'-diaminobenzidine substrate kit for 3-10 min and were then counterstained with hematoxylin at room temperature for 1-2 min, before visualization with an Olympus BX53 light microscope (Olympus Corporation).

Figure S1. Followed-up by CT examinations. CT scans in (A) January 2022, (B) July 2022, (C) January 2023, (D) July 2023 and (E) July 2024 showed no signs of recurrence or metastasis.

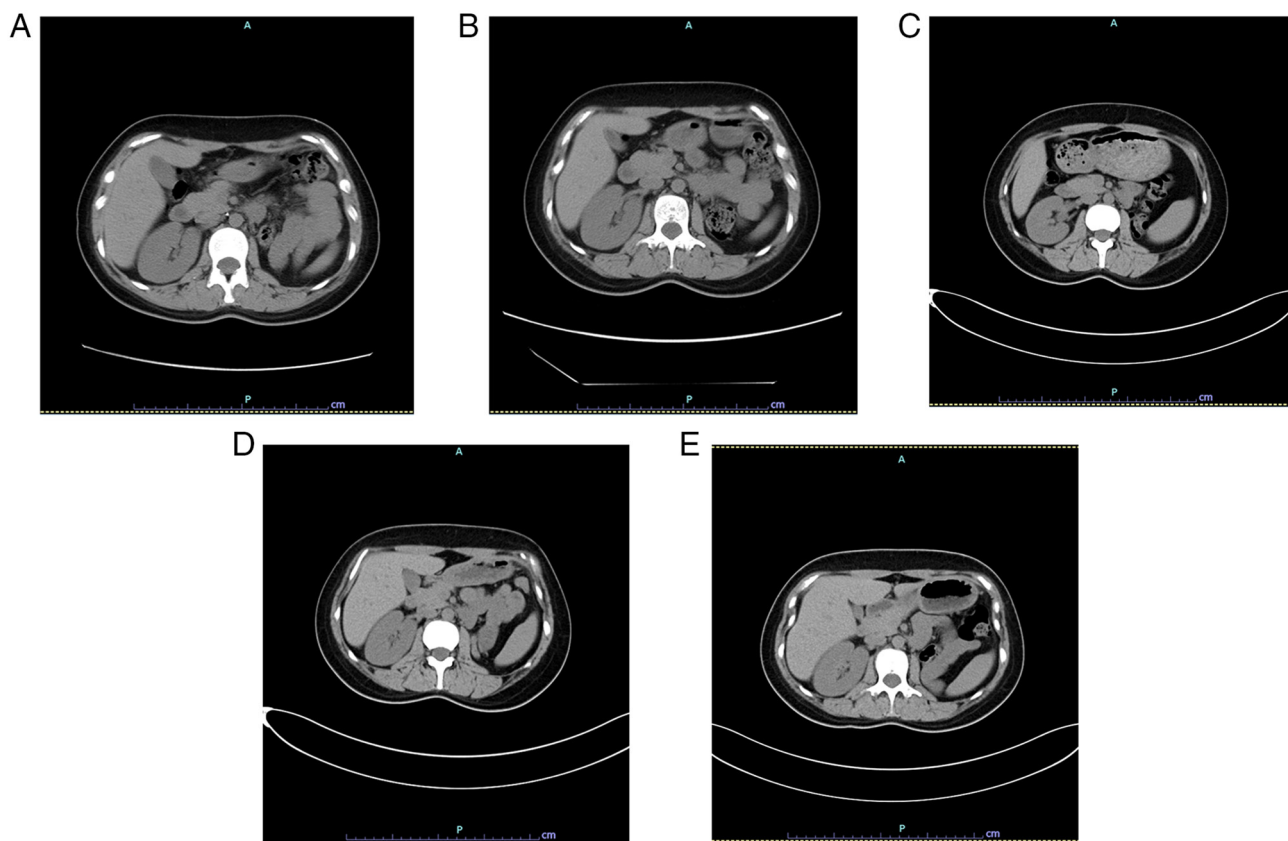

Supplement: Supplementary_Data1.pdf [file Supplementary_Data1.pdf]
