# Supplementary material for: Renal cell carcinoma with succinate dehydrogenase A mutation: A case report and literature review
Source: PubMed Central journal article supplement — Oncol Lett. 2024 Dec 3;29(2):84. doi: 10.3892/ol.2024.14830 (PMC11632410; doi:10.3892/ol.2024.14830), 2024-12-03
Supplement: Supplementary_Data2.pdf [file Supplementary_Data2.pdf]

Table SI. Results of immunohistochemistry and molecular studies of the tumor.

| Antibody    | Clone no./cat. no.   | Supplier                                         | Dilution     | Result |
|-------------|----------------------|--------------------------------------------------|--------------|--------|
| PAX-8       | ZR-1/ZA-0558         | Beijing Zhongshan Jinqiao Biotechnology Co., Ltd | 1:100        | +      |
| CAIX        | H-11/ZM-0161         | Beijing Zhongshan Jinqiao Biotechnology Co., Ltd | 1:100        | -      |
| CK7         | OV-TL12/30/ZM-0071   | Beijing Zhongshan Jinqiao Biotechnology Co., Ltd | 1:200        | -      |
| CD117       | Polyclonal           | Roche Diagnostics                                | Ready-to-use | -      |
| P504S       | 13H4/ZA-0227         | Beijing Zhongshan Jinqiao Biotechnology Co., Ltd | 1:200        | -      |
| Vimentin    | V9/ZM-0260           | Beijing Zhongshan Jinqiao Biotechnology Co., Ltd | 1:200        | -      |
| CD10        | HI10a/8720045        | Dako; Agilent Technologies, Inc.                 | Ready-to-use | -      |
| E-cadherin  | 4A2C7/ZM-0092        | Dako; Agilent Technologies, Inc.                 | 1:200        | -      |
| HMB45       | HMB45/ZM-0187        | Beijing Zhongshan Jinqiao Biotechnology Co., Ltd | 1:200        | -      |
| Cathepsin K | ab37259              | Abcam                                            | 1:600        | -      |
| Melan-A     | A103/ZM-0398         | Beijing Zhongshan Jinqiao Biotechnology Co., Ltd | Ready-to-use | -      |
| S-100       | 15E2E2+4C4.9/ZM-0224 | Beijing Zhongshan Jinqiao Biotechnology Co., Ltd | 1:200        | -      |
| TFE3        | MEQ-37/ZA-0570       | Beijing Zhongshan Jinqiao Biotechnology Co., Ltd | 1:200        | -      |
| TFEB        | Ab2636               | Abcam                                            | 1:1,000      | -      |
| FH          | JH05/FR-0101         | Shanghai Jiehao Biotechnology Co., Ltd           | Ready-to-use | +      |
| SDHA        | 2E3GC12FB2AE2        | Abcam                                            | 1:1,000      | Weak + |
| SDHB        | MX096/MAB-0888       | Fuzhou Maixin Biotechnology Development Co., Ltd | Ready-to-use | -      |
| Ki-67       | SP6                  | Dako; Agilent Technologies, Inc.                 | Ready-to-use | ~5%    |

SDH, succinate dehydrogenase.
